# Supplementary material for: Enhanced Air Stability of Perovskite Quantum Dots by Manganese Passivation
Source: MDPI journal article supplement (doi:10.3390/technologies10010010), 2022-01-16
Supplement: s1 [file s1]

## Supporting Information

### Enhanced the Air Stability of Perovskite Quantum Dots by Manganese Passivation

Ryota Sato <sup>1</sup>, Kazuki Umemoto<sup>1,2</sup>, Satoshi Asakura<sup>3</sup> and Akito Masuhara<sup>1,2\*</sup>

<sup>1</sup> Graduate School of Science and Engineering, Yamagata University, 4-3-16 Yonezawa, Yamagata 992-8510, JAPAN

<sup>2</sup> Frontier Center for Organic Materials (FROM), Yamagata University, 4-3-16 Yonezawa, Yamagata 992-8510, JAPAN

<sup>3</sup> Ise chemical corporation, 1-3-1, Kyobashi, Chuo-ku, Tokyo 104-00311, JAPAN

\* Correspondence: masuhara@yz.yamagata-u.ac.jp

**Table S1.** The optical properties of pure MAPbBr<sub>3</sub> or Mn/MAPbBr<sub>3</sub> QD dispersion.

| Sample | $\lambda_{PL}$ /nm | FWHM /nm | PLQY /% |
|--------|--------------------|----------|---------|
| Mn 0%  | 520                | 25.0     | 84.3    |
| Mn 1%  | 526                | 22.5     | 67.2    |
| Mn 2%  | 525                | 22.5     | 69.7    |
| Mn 3%  | 522                | 24.3     | 62.0    |
| Mn 4%  | 492                | 49.2     | 53.1    |

**Table S2.** The film state of pure MAPbBr<sub>3</sub> or Mn/MAPbBr<sub>3</sub> QDs every changing over time.

|                 | Mn 0%                                                                              | Mn 1%                                                                               | Mn 2%                                                                                | Mn 3%                                                                                 | Mn 4%                                                                                 |
|-----------------|------------------------------------------------------------------------------------|-------------------------------------------------------------------------------------|--------------------------------------------------------------------------------------|---------------------------------------------------------------------------------------|---------------------------------------------------------------------------------------|
| <b>0 days</b>   |   |    |     |    |    |
| <b>7 days</b>   |   |    |     |    |    |
| <b>30 days</b>  |   |    |     |    |    |
| <b>60days</b>   |  |   |    |   |   |
| <b>120 days</b> | —                                                                                  |  |  |  |  |

**Table S3.** The optical properties of MAPbBr<sub>3</sub> or Mn/MAPbBr<sub>3</sub> QD film.

| Sample   | Mn 0% | Mn 1% | Mn 2% | Mn 3% | Mn 4% |
|----------|-------|-------|-------|-------|-------|
| 0 day    | 59.7  | 56.2  | 89.2  | 66.2  | 51.5  |
| 7 days   | 51.5  | 41.1  | 90.4  | 72.7  | 44.5  |
| 14 days  | 21.8  | 43.2  | 83.7  | 64.2  | 33.4  |
| 21 days  | 16.9  | 26.6  | 83.9  | 61.3  | 32.0  |
| 30 days  | 11.3  | 33.1  | 64.0  | 60.6  | 25.8  |
| 60 days  | 5.22  | 18.4  | 47.4  | 34.8  | 26.0  |
| 120 days | -     | 14.5  | 36.5  | 29.9  | 17.3  |

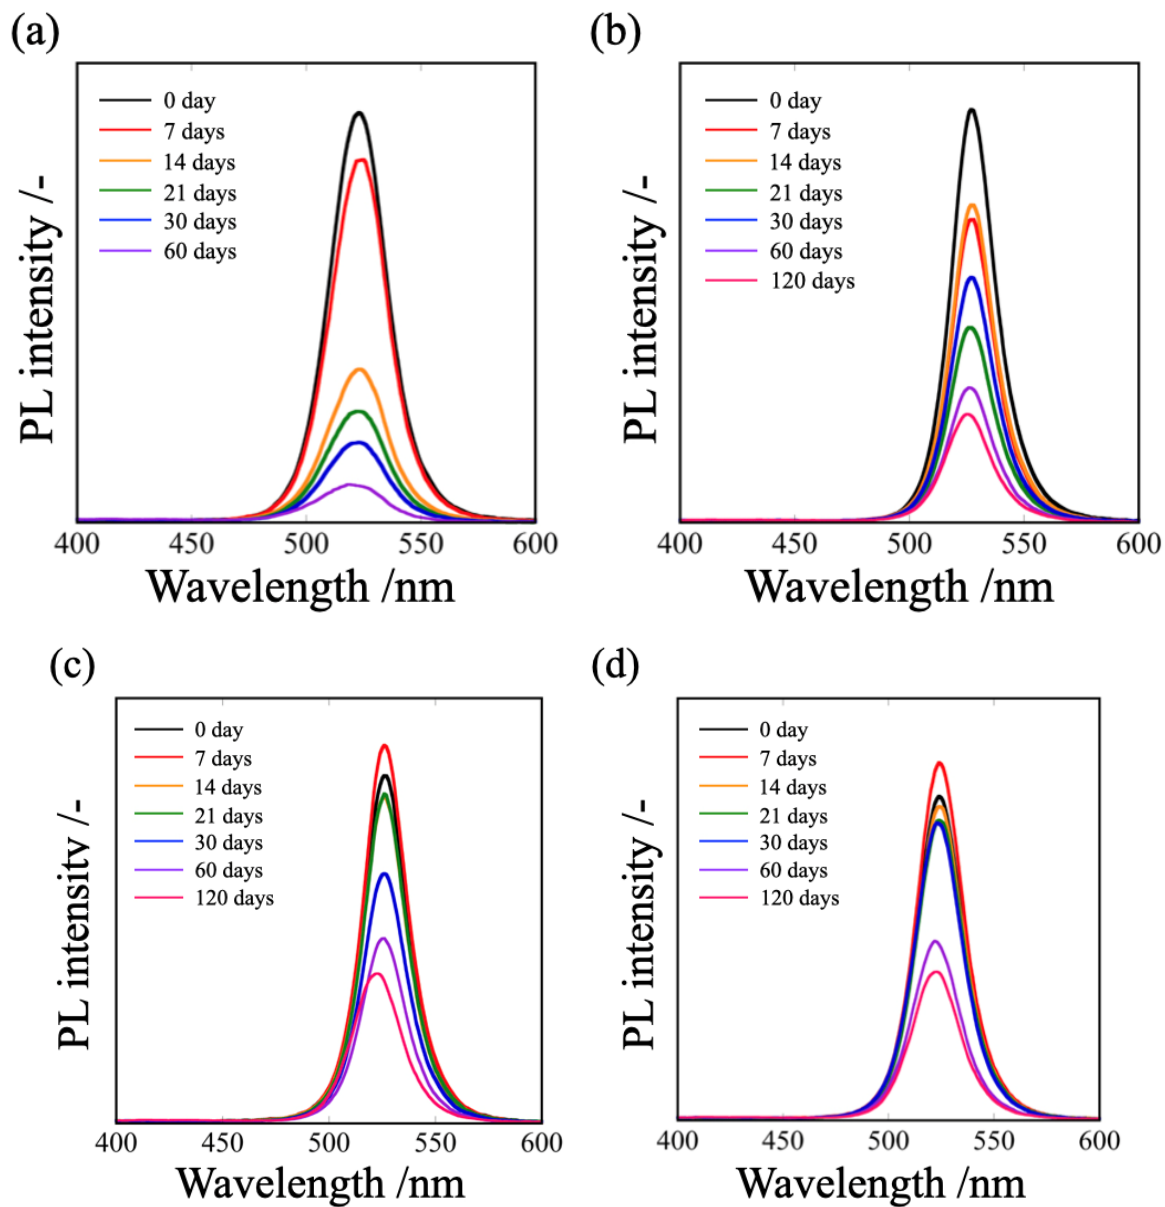

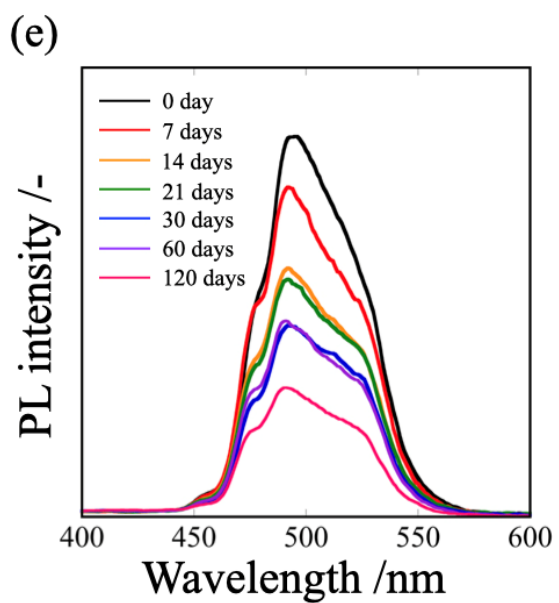

**Figure S1.** PL spectra of (a) pure MAPbBr<sub>3</sub>, (b) 1% Mn/MAPbBr<sub>3</sub>, (c) 2% Mn/MAPbBr<sub>3</sub>, (d) 3% Mn/MAPbBr<sub>3</sub>, and (e) 4% Mn/MAPbBr<sub>3</sub> QD film every changing over time from 0day to 4 months (120 days).
